# Supplementary material
Source: MDPI journal article supplement (https://www.mdpi.com/2071-1050/12/19/7912)
Supplement: s1 [file s1]

## Supplementary Material

Key features of the studies reviewed for social dimension of CE

| Code | Reference                          | Geographic context | Goal                                                                                                                                       | Scale (level) | industrial sector                       | Research type         |
|------|------------------------------------|--------------------|--------------------------------------------------------------------------------------------------------------------------------------------|---------------|-----------------------------------------|-----------------------|
| 1    | (Allam and Jones, 2018)            | Australia          | To develop a sociotechnical framework to consider the use of transformed plastic wastes                                                    | Macro         | Waste Management                        | Case study            |
| 2    | (Aquilani et al., 2018)            | Italy              | To investigate the trade-offs of the spatial, temporal and social dimension of urban growth                                                | Micro         | Waste Management                        | Theoretical approach  |
| 3    | (Amenta and van Timmeren, 2018)    | Italy              | To propose a framework to integrate key features of corporate sustainability to contribute to build bio-economies                          | Micro         | Not specified                           | Theoretical approach  |
| 4    | (Weslynn S. Ashton and Bain, 2012) | USA                | To develop a conceptual framework to identify and measure social characteristics of wastes management                                      | Micro         | Waste Management                        | Theoretical approach  |
| 5    | (Avdiushchenko, 2018)              | Poland             | To develop a regional monitoring framework to be used as an instrument for faster implementation of CE model                               | Macro         | Not specified                           | Theoretical approach  |
| 6    | (Azevedo et al., 2017)             | Portugal           | To assess corporate sustainability under a CE context to contribute the innovation of enterprises                                          | Micro         | Manufacture                             | Analytical assessment |
| 7    | (Biber-Freudenberger et al., 2018) | Germany            | To improve understanding of sustainability implications of the supply and demand of bio-based products                                     | Micro         | High-tech (biotechnology)               | Analytical assessment |
| 8    | (Boons et al., 2011)               | The Netherlands    | To propose a theoretical framework, which addresses bounded clusters of firms                                                              | Macro         | Not specified                           | Theoretical approach  |
| 9    | (Borrello et al., 2017)            | Italy              | To carry out an assessment regarding to the participation of consumers to circular agri-food loops to reduce wastes                        | Micro         | Waste Management (food)                 | Case study            |
| 10   | (Chaudhary and Vrat, 2018)         | India              | To develop a system dynamics model to study the sustainable benefits of circular flow of gold in cell phones supply chain                  | Macro         | Waste Management (cellphones/gold)      | Case study            |
| 11   | (Chen et al., 2019)                | UK                 | To understand the socio-economic implications of recovering nutrients from residues to recirculate to the next crop as an example of BE    | Micro         | Waste Management (food) and fertilizers | Analytical assessment |
| 12   | (Xue et al., 2010b)                | China              | To provide initial insight into awareness of municipal government officials with respect to the promotion process of CE                    | Macro         | Urban area                              | Survey                |
| 13   | (Chiappetta Jabbour et al., 2019)  | France             | To develop an integrate theoretical framework incorporating the role of Green Human Resource Management in further CE practices and policy | Micro         | Not specified                           | Theoretical approach  |
| 14   | (D'Amato et al., 2019)             | Finland            | Compare closed-looped economies (CE, BE, and GE)                                                                                           | Not mentioned | Not specified                           | Analytical assessment |

|    |                                    |                 |                                                                                                                                                                     |          |                      |                       |
|----|------------------------------------|-----------------|---------------------------------------------------------------------------------------------------------------------------------------------------------------------|----------|----------------------|-----------------------|
| 15 | (Dietz et al., 2018)               | Germany         | To develop and information tool that enables national and international policy makers to learn from other counties' BE strategies                                   | Macro    | Not specified        | Analytical assessment |
| 16 | (Puppim de Oliveira et al., 2013a) | Japan           | To link the concepts of governance and green economy in cities by identifying the key economic process in urban areas and assessing good governance                 | Macro    | Urban area           | Analytical assessment |
| 17 | (Domenech et al., 2019)            | UK              | To provide a descriptive mapping of IS and to identify key characteristics of IS networks.                                                                          | Meso     | Manufacture          | Analytical assessment |
| 18 | (Doménech et al., 2011)            | UK              | To analyze the mechanisms in the building of trust and embeddedness and identify phases in cooperation leading effective IS exchanges                               | Meso     | Waste Management     | Theoretical approach  |
| 19 | (Pitkänen et al., 2016)            | Finland         | To increase understanding of transition to GE by exploring qualitatively a range of practical GE cases from different fields                                        | Macro    | Energy, Wood, Wastes | Analytical assessment |
| 20 | (Egenolf et al., 2019)             | Germany         | To develop a framework for the evaluation of the sustainability of the BE, considering economic, social and environmental dimensions                                | Macro    | Not specified        | Theoretical approach  |
| 21 | (Fischer and Pascucci, 2017)       | The Netherlands | To compare empirical evidence on CE from textile industry to build a cohesive conceptual framework                                                                  | Micro    | Textile              | Analytical assessment |
| 22 | (Geissdoerfer et al., 2018)        | UK              | To discuss the sustainability performance of circular business model and circular supply chain necessary to implement                                               | Micro    | Manufacture          | Analytical assessment |
| 23 | (Girard and Nocca, 2017)           | Italy           | To identify a tourism management model able to produce multidimensional benefits, and reduce costs                                                                  | Macro    | Tourism              | Analytical assessment |
| 24 | (Gutberlet et al., 2017)           | Canada          | To address the challenge of expanding the social and political aspects of the CE concept, making social benefits more sustainable and less paternalistic            | Macro    | Waste Management     | Case study            |
| 25 | (Hagemann et al., 2016)            | Germany         | Identify influence factors for the future development of a wood BE                                                                                                  | Macro    | Wood                 | Survey                |
| 26 | (He et al., 2018a)                 | China           | To investigate what drives public acceptance and rejection of chemical industrial parks policies and projects                                                       | Micro    | Chemistry            | Survey                |
| 27 | (He et al., 2018b)                 | China           | To understand public perception, attitude, and response and the factors underlying the support/acceptance of Chemical industrial park                               | Micro    | Chemistry            | Survey                |
| 28 | (Iacovidou et al., 2017)           | UK              | To analyse environmental, economic, social and technical metrics used in waste management and resource recovery systems                                             | Multiple | Waste Management     | Analytical assessment |
| 28 | (Jasinevičius et al., 2017)        | Finland         | To assess impacts of increased domestic wood utilisation on employment, economic performance on the sector, and carbon balances in forest biomass and wood products | Macro    | Wood                 | Case study            |
| 30 | (Korhonen et al., 2018)            | Sweden          | To contribute to scientific research on CE by defining the concept from the perspective of sustainability                                                           | Macro    | Not specified        | Theoretical approach  |

|    |                                |              |                                                                                                                                                                                                                              |               |                      |                       |
|----|--------------------------------|--------------|------------------------------------------------------------------------------------------------------------------------------------------------------------------------------------------------------------------------------|---------------|----------------------|-----------------------|
|    |                                |              | science. Moreover, conduct a critical analysis of the concept from the perspective of environmental sustainability                                                                                                           |               |                      |                       |
| 31 | (Laurenti et al., 2018a)       | Sweden       | To highlight the role of developing an approach to reach a wider audience to communicate the waste footprint in the context of CE                                                                                            | Micro         | Not specified        | Survey                |
| 32 | (Laurenti et al., 2018b)       | Sweden       | To develop an integrative framework for recognising the socio-economic embeddedness of the CE                                                                                                                                | Not mentioned | Waste Management     | Theoretical approach  |
| 33 | (Loiseau et al., 2016)         | France       | To identify and describe the main theories and concepts related to a green economy and to illustrate their links to sustainability                                                                                           | Not mentioned | Not specified        | Analytical assessment |
| 34 | (Martin and Harris, 2018)      | Sweden       | To analyse the environmental and socio-economic implications of an emerging network using LCA and socio-economic assessment to illustrate the implications of the firms of the network and regional sustainability           | Micro         | Energy, Wood, Wastes | Case study            |
| 35 | (Mattila et al., 2018)         | Finland      | To complement local social sustainability which is often applied to forest systems with analysis of global social life cycle impacts, applying SHDB                                                                          | Multiple      | Wood                 | Case study            |
| 36 | (Millar et al., 2019)          | UK           | To examine the current relationship between the CE and SD                                                                                                                                                                    | Not mentioned | Not specified        | Analytical assessment |
| 37 | (Morales et al., 2019)         | France       | To explore the transition phases and the learning process of IS in order to appreciate the structural transformation in this complex system embodied by the organization strategy developed between actors and organizations | Micro         | Petrochemical        | Case study            |
| 38 | (Moreau et al., 2017b)         | Switzerland  | To examine the CE from a biophysical and social perspective to show that concept lacks the social and institutional dimensions to address the current material and energy throughput in the economy                          | Not mentioned | Not specified        | Theoretical approach  |
| 39 | (Murray et al., 2017)          | UK           | To explain the inter – and trans- disciplinary perspectives inherent in concepts of the CE that apply to the implementation of sustainable business                                                                          | Not mentioned | Not specified        | Analytical assessment |
| 40 | (Nahman et al., 2016)          | South Africa | To develop a composite index for measuring green economic performance, based on social, economic and environmental dimensions                                                                                                | Macro         | Not specified        | Theoretical approach  |
| 41 | (Pei et al., 2018)             | Taiwan       | To provide and overview of the interrelationship's tourism and sustainability from a cross-disciplinary perspective                                                                                                          | Macro         | Tourism              | Analytical assessment |
| 42 | (Pociovălișteanu et al., 2015) | Romania      | To study the situation of green jobs at the EU level and relationship between environment and employment, by analysing the link between employment and environmental policies                                                | Macro         | Green activities     | Analytical assessment |
| 43 | (Rafiaani et al., 2018)        | Belgium      | To propose a modified system approach for a social sustainability impact assessment of the bio-based                                                                                                                         | Not mentioned | Not specified        | Analytical assessment |

|    |                                |             |                                                                                                                                                                        |               |                                                    |                       |
|----|--------------------------------|-------------|------------------------------------------------------------------------------------------------------------------------------------------------------------------------|---------------|----------------------------------------------------|-----------------------|
|    |                                |             | economy, considering all life cycle phases of the economy                                                                                                              |               |                                                    |                       |
| 44 | (Sacirovic et al., 2018)       | Serbia      | To give an overview of all the major problems of the city, with the tracking of generator pollutants in urban and rural parts of the city                              | Meso          | Manufacture                                        | Analytical assessment |
| 45 | (Sahakian, 2015)               | Switzerland | To illustrate the linkages between industrial ecology and the social solidarity economy                                                                                | Not mentioned | Not specified                                      | Analytical assessment |
| 46 | (Schroeder et al., 2018)       | UK          | To identify relevant CE practices and synergies in the context of SDGs and its implementation                                                                          | Not mentioned | Waste Management (e-wastes, municipal, wastewater) | Analytical assessment |
| 47 | (Siyambalapitiya et al., 2018) | China       | To provide a quick historical overview of green growth and its evolution as research about new discourses for green growth in direction of a CE                        | Macro         | Not specified                                      | Analytical assessment |
| 48 | (Stern et al., 2018)           | Austria     | To explore how bio economy is perceived, understood and evaluated by a wider audience                                                                                  | Macro         | Not specified                                      | Survey                |
| 49 | (Sun et al., 2017)             | UK          | To contribute to understanding dynamics of IS in the context of eco-industrial development                                                                             | Meso          | Not specified                                      | Analytical assessment |
| 50 | (Ünal and Shao, 2019)          | Italy       | To examine how organizations combine CE capabilities with resources for their long-term competitive goals                                                              | Micro         | Multiple                                           | Analytical assessment |
| 51 | (Veleva et al., 2017)          | USA         | To propose a model for expanded zero waste practice, which includes additional indicators for measuring outcomes and impacts of circular business strategies           | Micro         | High-tech (pharmaceutical)                         | Theoretical approach  |
| 52 | (Williams, 2019)               | UK          | To explore the challenges to looping actions within resource sectors and for specific actions                                                                          | Macro         | Urban area                                         | Analytical assessment |
| 53 | (Winkler et al., 2019)         | Germany     | To investigate the ways in which urban garden can influence consumer behaviour and act as a potential starting point for a more sustainable lifestyle                  | Micro         | Food                                               | Survey                |
| 54 | (Yedla and Park, 2017)         | India       | To analyse the key drivers to such a networking, identifies what are the conditions and strategies required at different levels, and barriers for their implementation | Meso          | Not specified                                      | Analytical assessment |
| 55 | (Zeug et al., 2019)            | Germany     | To capture and map the societal interests and perceptions of the most relevant stakeholder groups of BE by means of SDGs                                               | Not mentioned | Not specified                                      | Analytical assessment |
| 56 | (Zhang et al., 2009)           | Japan       | To argue the perspectives of SD of socio-economic and environmental performance, by reviewing the relevant literature of current CE and EIPs                           | Meso          | Multiple                                           | Analytical assessment |
| 57 | (Zhao et al., 2018)            | China       | To develop a framework to assess the comprehensive benefit of eco-industrial parks in terms of CE and sustainability                                                   | Meso          | Multiple                                           | Analytical assessment |
| 58 | (Zhao et al., 2017)            | China       | To develop a hybrid framework for evaluating the comprehensive benefit of eco-industrial parks from the perspective of CE                                              | Meso          | Multiple                                           | Analytical assessment |

|    |                     |          |                                                                                                                                                                                                                       |               |               |                       |
|----|---------------------|----------|-----------------------------------------------------------------------------------------------------------------------------------------------------------------------------------------------------------------------|---------------|---------------|-----------------------|
| 59 | (Zore et al., 2018) | Slovenia | To describe an upgraded concept of sustainability metric (SP) from various micro-and macroeconomic perspectives and how it can be used for the synthesis of production systems in order to increase their circularity | Meso          | Energy        | Analytical assessment |
| 60 | (Koumparou, 2017)   | Greece   | Explores the social dimension of the circular economy under a sustainable perspective and to know how circular economy recognize interconnections with society                                                        | Not mentioned | Not specified | Theoretical approach  |
